# Supplementary material for: Greek Semi-Hard and Hard Cheese Consumers’ Perception in the New Global Era
Source: MDPI journal article supplement (doi:10.3390/su15075825), 2023-03-27
Supplement: s1 [file s1]

---

*Supplementary Materials*

# Greek Semi-Hard and Hard Cheese Consumers' Perception in the New Global Era

Dimitris Skalkos <sup>1,\*</sup>, Katerina Bamicha <sup>1</sup>, Ioanna S. Kosma <sup>1</sup> and Elpida Samara <sup>2</sup>

<sup>1</sup> Laboratory of Food Chemistry, Department of Chemistry, University of Ioannina, 45110 Ioannina, Greece; pch01419@uoi.gr (K.B.); i.kosma@uoi.gr (I.S.K.)

<sup>2</sup> Department of Regional Development and Cross Border Studies, University of Western Macedonia, 50100 Kozani, Greece; esamara@uowm.gr

\* Correspondence: dskalkos@uoi.gr; Tel.: +30-(26)-5100-8345

**Table. S1.** Questionnaire consumers' perception for quality greek semi-hard and hard cheese in the post covid-19 era i. demographics (customers' profile).

| <b>SEX</b> |
|------------|
| MALE       |
| FEMALE     |

| <b>1. Age</b> |
|---------------|
| 18-25         |
| 26-35         |
| 36-45         |
| 46-55         |
| 56+           |

| <b>2. Level of education</b> |
|------------------------------|
| None/Primary school          |
| Secondary school             |
| High school                  |
| University                   |

| <b>3. Civil state</b> |
|-----------------------|
| Single                |
| Married               |
| Divorced              |
| Widow / widower       |

| <b>4. Job situation</b> |
|-------------------------|
| Employed                |
| Unemployed              |
| Student                 |
| Retired                 |

| <b>5. Permanent resident in Greece</b>                     |
|------------------------------------------------------------|
| NORTH GREECE (regions of Macedonia – Thrace)               |
| WEST GREECE (region of Epirus – Aitolokarnania prefecture) |
| CENTRAL GREECE (including Athens)                          |
| SOUTH GREECE (region of Peloponnese)                       |
| ISLANDS                                                    |

Choose in the scale between Not at all important and very important regarding the following sentences

(Mark your answer with X).

## II. PURCHASE AND CONSUMPTION OF GREEK SEMI-HARD AND HARD CHEESE IN THE POST COVID-19 ERA

| 1. From where DID YOU PURCHASE the Greek semi-hard and hard cheese you consumed before COVID-19? (give ONE answer for every choice) | Never                    | Very seldom              | Seldom                   | Often                    | Very often               |
|-------------------------------------------------------------------------------------------------------------------------------------|--------------------------|--------------------------|--------------------------|--------------------------|--------------------------|
| From supermarket                                                                                                                    | <input type="checkbox"/> |
| From the neighborhood grocery store                                                                                                 | <input type="checkbox"/> |
| From open market                                                                                                                    | <input type="checkbox"/> |
| Via online                                                                                                                          | <input type="checkbox"/> |
| 2. From where DO YOU PURCHASE the GREEK SEMI-HARD AND HARD CHEESE you consume now? (give ONE answer for every choice)               | Never                    | Very seldom              | Seldom                   | Often                    | Very often               |
| From supermarket                                                                                                                    | <input type="checkbox"/> |
| From the neighborhood grocery store                                                                                                 | <input type="checkbox"/> |
| From open market                                                                                                                    | <input type="checkbox"/> |
| Via online                                                                                                                          | <input type="checkbox"/> |
| 3. How much GREEK SEMI-HARD AND HARD CHEESE do you buy per month today (ONLY one answer)                                            | Mark only ONE answer     |                          |                          |                          |                          |
| One (1) Kg per month                                                                                                                |                          |                          | <input type="checkbox"/> |                          |                          |
| Two (2) Kg per month                                                                                                                |                          |                          | <input type="checkbox"/> |                          |                          |
| Three (3) Kg per month                                                                                                              |                          |                          | <input type="checkbox"/> |                          |                          |
| Four (4) Kg per month                                                                                                               |                          |                          | <input type="checkbox"/> |                          |                          |
| Zero (0) Kg per month (don't buy such cheese at all)                                                                                |                          |                          | <input type="checkbox"/> |                          |                          |
| 4. How much MONEY do you send MONTHLY for the purchase of GREEK SEMI-HARD AND HARD CHEESE (ONLY one answer)                         | Mark only ONE answer     |                          |                          |                          |                          |
| Up tp 10 euros                                                                                                                      |                          |                          | <input type="checkbox"/> |                          |                          |
| 10 – 20 euros                                                                                                                       |                          |                          | <input type="checkbox"/> |                          |                          |
| 20-30 euros                                                                                                                         |                          |                          | <input type="checkbox"/> |                          |                          |
| More than 30 euros                                                                                                                  |                          |                          | <input type="checkbox"/> |                          |                          |
| 5. How often do you consume GREEK SEMI-HARD AND HARD CHEESE                                                                         | Mark only ONE answer     |                          |                          |                          |                          |
| Every day                                                                                                                           |                          |                          | <input type="checkbox"/> |                          |                          |
| Once a week                                                                                                                         |                          |                          | <input type="checkbox"/> |                          |                          |
| Two times per week                                                                                                                  |                          |                          | <input type="checkbox"/> |                          |                          |
| Once every two weeks                                                                                                                |                          |                          | <input type="checkbox"/> |                          |                          |
| Once per month                                                                                                                      |                          |                          | <input type="checkbox"/> |                          |                          |
| 6. Do you consume MORE or LESS GREEK SEMI-HARD AND HARD CHEESE TODAY as compared with the period BEFORE COVID-19 (ONLY one answer)  | Mark ONE answer only     |                          |                          |                          |                          |
|                                                                                                                                     | More                     |                          | Less                     |                          |                          |
|                                                                                                                                     | <input type="checkbox"/> |                          | <input type="checkbox"/> |                          |                          |

|                                                                                                                                                                         |                               |                          |
|-------------------------------------------------------------------------------------------------------------------------------------------------------------------------|-------------------------------|--------------------------|
| <b>7. Do you consume MORE GREEK SEMI-HARD AND HARD CHEESE as compared with IMPORTED SEMI-HARD AND HARD CHEESE (i.e. cheddar, pecorino, edam etc.) (ONLY one answer)</b> | Mark ONE answer only          |                          |
|                                                                                                                                                                         | More                          | Less                     |
|                                                                                                                                                                         | <input type="checkbox"/>      | <input type="checkbox"/> |
| <b>8. Which KINDS OF GREEK SEMI-HARD AND HARD CHEESES do you consume TODAY (You can give more than one answer)</b>                                                      | Mark as many choices you want |                          |
| Graviera                                                                                                                                                                | <input type="checkbox"/>      |                          |
| Kefalograviera                                                                                                                                                          | <input type="checkbox"/>      |                          |
| Ladotyri                                                                                                                                                                | <input type="checkbox"/>      |                          |
| Kaseri                                                                                                                                                                  | <input type="checkbox"/>      |                          |
| Kefalotiri                                                                                                                                                              | <input type="checkbox"/>      |                          |
| Others                                                                                                                                                                  | <input type="checkbox"/>      |                          |
| <b>9. With what do you consume THE GREEK SEMI-HARD AND HARD CHEESE TODAY (you can give more than one answer)</b>                                                        | Mark as many choices you want |                          |
| Meat                                                                                                                                                                    | <input type="checkbox"/>      |                          |
| Fish                                                                                                                                                                    | <input type="checkbox"/>      |                          |
| Wine                                                                                                                                                                    | <input type="checkbox"/>      |                          |
| Bread and olives                                                                                                                                                        | <input type="checkbox"/>      |                          |
| Fruits                                                                                                                                                                  | <input type="checkbox"/>      |                          |
| Nuts                                                                                                                                                                    | <input type="checkbox"/>      |                          |
| Alone                                                                                                                                                                   | <input type="checkbox"/>      |                          |
| <b>10. Where do you consume mostly the SEMI-HARD AND HARD CHEESE TODAY? (you can give more than one answer)</b>                                                         | Mark as many choices you want |                          |
| At home                                                                                                                                                                 | <input type="checkbox"/>      |                          |
| At the restaurant                                                                                                                                                       | <input type="checkbox"/>      |                          |
| With friends                                                                                                                                                            | <input type="checkbox"/>      |                          |
| During lunch time                                                                                                                                                       | <input type="checkbox"/>      |                          |
| During the dinner                                                                                                                                                       | <input type="checkbox"/>      |                          |
| Occasionally                                                                                                                                                            | <input type="checkbox"/>      |                          |

### III. PREFERENCE OF CHOICE FOR QUALITY GREEK SEMI-HARD AND HARD CHEESE IN THE POST COVID-19 ERA

| <b>11. How important are for you the following INFORMATION for the selection of QUALITY GREEK SEMI-HARD AND HARD CHEESE</b> | Not at all               | Little                   | Medium Level             | Much                     | Very much                |
|-----------------------------------------------------------------------------------------------------------------------------|--------------------------|--------------------------|--------------------------|--------------------------|--------------------------|
| 1. The price of the semi-hard and hard cheese                                                                               | <input type="checkbox"/> |
| 2. The branding                                                                                                             | <input type="checkbox"/> |
| 3. The date of production                                                                                                   | <input type="checkbox"/> |
| 4. The geographical origin                                                                                                  | <input type="checkbox"/> |
| 5. The existence of quality certificates such as PDO (Protected Designation of Origin) etc.                                 | <input type="checkbox"/> |

|                                                                                                                                            |                          |                          |                          |                          |                          |
|--------------------------------------------------------------------------------------------------------------------------------------------|--------------------------|--------------------------|--------------------------|--------------------------|--------------------------|
| <b>12. How important are the following <u>ORGANOLEPTIC PARAMETERS</u> for the selection of QUALITY GREEK SEMI-HARD AND HARD CHEESE</b>     | Not at all               | Little                   | Medium Level             | Much                     | Very much                |
| 1. The flavor                                                                                                                              | <input type="checkbox"/> |
| 2. The aroma                                                                                                                               | <input type="checkbox"/> |
| 3. The taste                                                                                                                               | <input type="checkbox"/> |
| 4. The hardness                                                                                                                            | <input type="checkbox"/> |
| 5. The odor                                                                                                                                | <input type="checkbox"/> |
| <b>13. How important are the following <u>APPEARANCE PARAMETERS</u> for the selection of QUALITY GREEK SEMI-HARD AND HARD CHEESE</b>       | Not at all               | Little                   | Medium Level             | Much                     | Very much                |
| 1. The color                                                                                                                               | <input type="checkbox"/> |
| 2. The appearance                                                                                                                          | <input type="checkbox"/> |
| 3. The texture                                                                                                                             | <input type="checkbox"/> |
| 4. The package appearance                                                                                                                  | <input type="checkbox"/> |
| 5. The size of the package (i.e. 200 gr / 400gr / 0,5Kg / 1 Kg etc)                                                                        | <input type="checkbox"/> |
| <b>14. How important are the following <u>SUSTAINABLE CHARACTERISTICS</u> for the selection of QUALITY GREEK SEMI-HARD AND HARD CHEESE</b> | Not at all               | Little                   | Medium Level             | Much                     | Very much                |
| 1. Origin of the milk (cow, goat, sheep, or mixture)                                                                                       | <input type="checkbox"/> |
| 2. Biological                                                                                                                              | <input type="checkbox"/> |
| 3. Nutritional indications                                                                                                                 | <input type="checkbox"/> |
| 4. Fat sanity                                                                                                                              | <input type="checkbox"/> |
| 5. Low salt                                                                                                                                | <input type="checkbox"/> |
| <b>15. How important are the following <u>GENERAL CHARACTERISTICS</u> for the selection of QUALITY GREEK SEMI-HARD AND HARD CHEESE</b>     | Not at all               | Little                   | Medium Level             | Much                     | Very much                |
| 1. Rational value for money                                                                                                                | <input type="checkbox"/> |
| 2. Unique and special                                                                                                                      | <input type="checkbox"/> |
| 3. Added value for the region where it is produced                                                                                         | <input type="checkbox"/> |
| 4. A myth (historical narrative)                                                                                                           | <input type="checkbox"/> |
| 5. Timeless but also modern                                                                                                                | <input type="checkbox"/> |

#### IV. KNOWLEDGE AND PREFERENCE OF THE "LADOTYRI» CHEESE IN THE POST COVID-19 ERA

|                                                                           |                          |                          |
|---------------------------------------------------------------------------|--------------------------|--------------------------|
| <b>16. Do you know the LADOTYRI CHEESE?</b>                               | YES                      | NO                       |
|                                                                           | <input type="checkbox"/> | <input type="checkbox"/> |
| <b>17. Have you tasted LADOTYRI or are you consuming it occasionally?</b> | YES                      | NO                       |
|                                                                           | <input type="checkbox"/> | <input type="checkbox"/> |
| <b>18. Where do you think is LADOTYRI produced?</b>                       | Mark ONE answer ONLY     |                          |
| Epirus region                                                             | <input type="checkbox"/> |                          |
| Samos island                                                              | <input type="checkbox"/> |                          |
| Macedonia region                                                          | <input type="checkbox"/> |                          |
| Creta island                                                              | <input type="checkbox"/> |                          |
| Peloponnese region                                                        | <input type="checkbox"/> |                          |
| Lesvos island                                                             | <input type="checkbox"/> |                          |
| Lemnos island                                                             | <input type="checkbox"/> |                          |

|                                                                                                                                              |                              |                          |                          |
|----------------------------------------------------------------------------------------------------------------------------------------------|------------------------------|--------------------------|--------------------------|
| None of the above                                                                                                                            |                              | <input type="checkbox"/> |                          |
| <b>19. Which do you think are the unique characteristics of LADOTYRI?</b>                                                                    | Mark ONE to TWO answers only |                          |                          |
| Bitter taste                                                                                                                                 |                              | <input type="checkbox"/> |                          |
| Unique aroma                                                                                                                                 |                              | <input type="checkbox"/> |                          |
| Unique flavor                                                                                                                                |                              | <input type="checkbox"/> |                          |
| Low salt                                                                                                                                     |                              | <input type="checkbox"/> |                          |
| Healthy                                                                                                                                      |                              | <input type="checkbox"/> |                          |
| POD product of origin                                                                                                                        |                              | <input type="checkbox"/> |                          |
| You don't know                                                                                                                               |                              | <input type="checkbox"/> |                          |
| <b>20. Do you think it is an added value the OLIVE OIL in which LADOTYRI is inside?</b>                                                      | YES                          |                          | NO                       |
|                                                                                                                                              | <input type="checkbox"/>     |                          | <input type="checkbox"/> |
| <b>21. Do you think it will be an added value if LADOTYRI is the ONLY NON-REFRIGERATED GREEK CHEESE preserved by the olive oil it is in?</b> | YES                          |                          | NO                       |
|                                                                                                                                              | <input type="checkbox"/>     |                          | <input type="checkbox"/> |
| <b>22. Would you buy, or prefer a non-refrigerated CHEESE TODAY, after the COVID-19 pandemic?</b>                                            | YES                          |                          | NO                       |
|                                                                                                                                              | <input type="checkbox"/>     |                          | <input type="checkbox"/> |
| <b>23. What would you like to eat with the LADOTYRI CHEESE if you had the chance? (ONLY one answer)</b>                                      | Mark ONE or TWO answers      |                          |                          |
| Meat                                                                                                                                         |                              | <input type="checkbox"/> |                          |
| Fish                                                                                                                                         |                              | <input type="checkbox"/> |                          |
| Wine                                                                                                                                         |                              | <input type="checkbox"/> |                          |
| Bread and olives                                                                                                                             |                              | <input type="checkbox"/> |                          |
| Fruits                                                                                                                                       |                              | <input type="checkbox"/> |                          |
| Nuts                                                                                                                                         |                              | <input type="checkbox"/> |                          |
| Alone                                                                                                                                        |                              | <input type="checkbox"/> |                          |
| <b>24. Where would you like to purchase LADOTYRI cheese if you had the chance TODAY (ONLY one answer)</b>                                    | Mark only ONE answer         |                          |                          |
| From supermarket                                                                                                                             |                              | <input type="checkbox"/> |                          |
| From the neighborhood grocery store                                                                                                          |                              | <input type="checkbox"/> |                          |
| From open market                                                                                                                             |                              | <input type="checkbox"/> |                          |
| Via on line                                                                                                                                  |                              | <input type="checkbox"/> |                          |
| <b>25. Do you believe that LESVOS' island is producing quality cheeses or not, compared with the rest of Greece</b>                          | YES                          |                          | NO                       |
|                                                                                                                                              | <input type="checkbox"/>     |                          | <input type="checkbox"/> |

**Table S2.** Associations between motives on purchase and consumption of Greek semi-hard and hard cheese and the sociodemographic variables.

|                                                                                               | Gender           |       |       | Age            |       |       | Level of Education |       |       | Civil state    |       |       | Job situation  |       |       | Residency      |       |       |
|-----------------------------------------------------------------------------------------------|------------------|-------|-------|----------------|-------|-------|--------------------|-------|-------|----------------|-------|-------|----------------|-------|-------|----------------|-------|-------|
|                                                                                               | X <sup>2</sup> * | V**   | p***  | X <sup>2</sup> | V     | p     | X <sup>2</sup>     | V     | p     | X <sup>2</sup> | V     | p     | X <sup>2</sup> | V     | p     | X <sup>2</sup> | V     | p     |
| From where DID YOU PURCHASE the Greek semi-hard and hard cheese you consumed before COVID-19? |                  |       |       |                |       |       |                    |       |       |                |       |       |                |       |       |                |       |       |
| From supermarket                                                                              |                  |       |       |                |       |       | 51.174             |       | 0.175 |                | 0.000 |       |                |       |       |                |       |       |
| From the neighborhood                                                                         |                  |       |       |                |       |       |                    |       |       |                |       |       |                |       |       |                |       |       |
| grocery store                                                                                 |                  |       |       |                |       |       |                    |       |       |                |       |       |                |       |       | 27.677         | 0.100 | 0.035 |
| From open market                                                                              |                  |       |       |                |       |       |                    |       |       |                |       |       |                |       |       | 53.786         | 0.143 | 0.000 |
| Via on line                                                                                   |                  |       |       | 63.711         | 0.156 | 0.001 | 325.401            | 0.500 | 0.000 | 83.932         | 0.208 | 0.000 | 40.661         | 0.145 | 0.001 | 46.313         | 0.134 | 0.000 |
| From where DO YOU PURCHASE the GREEK SEMI-HARD AND HARD CHEESE you consume now?               |                  |       |       |                |       |       |                    |       |       |                |       |       |                |       |       |                |       |       |
| From supermarket                                                                              | 12.641           | 0.123 | 0.013 |                |       |       | 53.735             | 0.179 | 0.001 |                |       |       |                |       |       |                |       |       |
| From the neighborhood                                                                         |                  |       |       |                |       |       |                    |       |       |                |       |       |                |       |       |                |       |       |
| grocery store                                                                                 |                  |       |       |                |       |       |                    |       |       |                |       |       |                |       |       | 33.018         | 0.110 | 0.007 |
| From open market                                                                              |                  |       |       |                |       |       |                    |       |       |                |       |       |                |       |       | 41.879         | 0.127 | 0.00  |
| Via on line                                                                                   |                  |       |       |                |       |       | 134.631            | 0.324 | 0.001 | 35.527         | 0.136 | 0.001 | 23.211         | 0.110 | 0.026 |                |       |       |
| How much GREEK SEMI-HARD AND HARD CHEESE do you buy per month today?                          |                  |       |       |                |       |       |                    |       |       |                |       |       |                |       |       |                |       |       |
| One (1) Kg per month                                                                          | 6.192            | 0.085 | 0.013 |                |       |       |                    |       |       |                |       |       |                |       |       | 15.865         | 0.136 | 0.003 |
| Two (2) Kg per month                                                                          |                  |       |       |                |       |       |                    |       |       |                |       |       |                |       |       |                |       |       |
| Three (3) Kg per month                                                                        |                  |       |       |                |       |       |                    |       |       |                |       |       |                |       |       |                |       |       |
| Four (4) Kg per month                                                                         | 4.985            | 0.076 | 0.026 |                |       |       | 37.171             | 0.208 | 0.000 | 35.691         | 0.205 | 0.000 |                |       |       | 10.457         | 0.111 | 0.033 |
| Zero (0) Kg per month                                                                         |                  |       |       |                |       |       |                    |       |       |                |       |       |                |       |       |                |       |       |
| (don't buy such cheese at all)                                                                |                  |       |       |                |       |       |                    |       |       |                |       |       |                |       |       |                |       |       |
| How much MONEY do you send MONTHLY for the purchase of GREEK SEMI-HARD AND HARD CHEESE        |                  |       |       |                |       |       |                    |       |       |                |       |       |                |       |       |                |       |       |
| Up tp 10 euros                                                                                | 15.895           | 0.136 | 0.001 | 53.769         | 0.250 | 0.001 |                    |       |       | 34.771         | 0.202 | 0.001 | 59.505         | 0.264 | 0.001 | 25.823         | 0.174 | 0.000 |
| 10 – 20 euros                                                                                 |                  |       |       | 16.068         | 0.137 | 0.003 |                    |       |       | 13.48          | 0.126 | 0.004 | 18.486         | 0.147 | 0.000 |                |       |       |
| 20-30 euros                                                                                   | 8.820            | 0.101 | 0.003 | 14.338         | 0.129 | 0.006 |                    |       |       | 10.278         | 0.110 | 0.016 | 16.673         | 0.140 | 0.001 | 19.487         | 0.151 | 0.001 |
| More than 30 euros                                                                            |                  |       |       | 52.805         | 0.248 | 0.000 | 38.768             | 0.213 | 0.000 | 24.23          | 0.169 | 0.010 | 23.300         | 0.165 | 0.000 | 11.935         | 0.118 | 0.018 |
| How often do you buy GREEK SEMI-HARD AND HARD CHEESE                                          |                  |       |       |                |       |       |                    |       |       |                |       |       |                |       |       |                |       |       |
| Every day                                                                                     |                  |       |       |                |       |       |                    |       |       |                |       |       |                |       |       |                |       |       |

|                                                                                                                                             |       |        |       |       |       |        |        |        |       |        |        |        |         |       |       |
|---------------------------------------------------------------------------------------------------------------------------------------------|-------|--------|-------|-------|-------|--------|--------|--------|-------|--------|--------|--------|---------|-------|-------|
| Once a week                                                                                                                                 |       |        |       |       |       |        |        |        |       |        |        |        |         |       |       |
| Two time per week                                                                                                                           |       |        |       |       |       |        |        |        |       |        |        |        |         |       |       |
| Once every two weeks                                                                                                                        |       |        |       |       |       |        |        |        |       |        |        |        |         |       |       |
| Once per month                                                                                                                              |       |        |       |       |       |        |        |        |       |        |        |        |         |       |       |
| Do you consume MORE or LESS GREEK SEMI-HARD AND HARD CHEESE TODAY as compared with the period BEFORE COVID-19                               |       |        |       |       |       |        |        |        |       |        |        |        |         |       |       |
|                                                                                                                                             |       |        |       |       |       |        |        |        |       |        |        |        |         |       |       |
| Do you consume MORE GREEK SEMI-HARD AND HARD CHEESE as compared with IMPORTED SEMI-HARD AND HARD CHEESE (i.e. cheddar, pecorino, edam etc.) |       |        |       |       |       |        |        |        |       |        |        |        |         |       |       |
|                                                                                                                                             |       |        |       |       |       |        |        |        |       |        |        |        |         |       |       |
| Which KINDS OF GREEK SEMI-HARD AND HARD CHEESES do you consume TODAY                                                                        |       |        |       |       |       |        |        |        |       |        |        |        |         |       |       |
| Graviera                                                                                                                                    |       | 11.419 | 0.116 | 0.022 |       |        |        | 14.762 | 0.132 | 0.002  | 27.703 | 0.181  | 0.000   |       |       |
| Kefalograviera                                                                                                                              |       |        |       |       |       |        |        | 9.770  | 0.107 | 0.021  | 16.059 | 0.137  | 0.003   |       |       |
| Ladotyri                                                                                                                                    | 5.004 | 0.077  | 0.025 |       |       |        |        |        |       |        |        |        |         |       |       |
| Kaseri                                                                                                                                      |       | 37.966 | 0.211 | 0.000 |       |        | 13.117 | 0.124  | 0.004 | 22.123 | 0.161  | 0.000  | 125.493 | 0.384 | 0.001 |
| Kefalotiri                                                                                                                                  |       | 20.001 | 0.153 | 0.000 |       |        | 11.117 | 0.117  | 0.008 |        |        |        |         |       |       |
| Others                                                                                                                                      |       |        |       |       |       |        |        |        |       |        |        |        |         |       |       |
| With what DO YOU THE SEMI-HARD AND HARD CHEESE consumption TODAY                                                                            |       |        |       |       |       |        |        |        |       |        |        |        |         |       |       |
| Meat                                                                                                                                        |       |        |       |       |       |        |        |        |       |        |        |        |         |       |       |
| Fish                                                                                                                                        | 5.229 | 0.078  | 0.022 |       |       | 28.651 |        | 0.184  | 0.000 |        |        |        |         |       |       |
| Wine                                                                                                                                        |       |        |       |       |       |        |        |        |       |        |        |        |         |       |       |
| Chicken                                                                                                                                     |       | 9.807  | 0.107 | 0.044 |       |        |        |        |       |        |        | 10.590 | 0.112   | 0.032 |       |
| Fruits                                                                                                                                      |       |        |       |       |       |        |        |        |       |        |        |        |         |       |       |
| Bread and Olives                                                                                                                            |       |        |       |       |       |        | 14.085 | 0.129  | 0.003 |        |        | 15.560 | 0.136   | 0.004 |       |
| Alone                                                                                                                                       |       | 12.202 | 0.120 | 0.016 |       |        | 9.896  | 0.108  | 0.019 |        |        |        |         |       |       |
| Where do you consume mostly the SEMI-HARD AND HARD CHEESE TODAY?                                                                            |       |        |       |       |       |        |        |        |       |        |        |        |         |       |       |
| At home                                                                                                                                     |       | 4.450  | 0.072 | 0.035 |       |        |        |        |       |        |        |        |         |       |       |
| At the restaurant                                                                                                                           |       |        |       |       |       |        | 8.000  | 0.097  | 0.046 |        |        |        |         |       |       |
| With friends                                                                                                                                |       |        |       |       | 7.449 | 0.094  | 0.024  | 12.382 | 0.121 | 0.006  |        |        |         |       |       |
| During lunch time                                                                                                                           |       | 10.436 | 0.111 | 0.034 | 7.203 | 0.092  | 0.027  | 20.972 | 0.157 | 0.000  |        |        |         |       |       |
| During the dinner                                                                                                                           |       |        |       |       |       |        |        | 10.214 | 0.110 | 0.017  |        |        |         |       |       |
| Occasionally                                                                                                                                |       |        |       |       |       |        |        |        |       |        |        |        |         |       |       |
| * chi-square test, ** Cramer's or Phi coefficient, and *** level of significance of 5%: $p < 0.05$ .                                        |       |        |       |       |       |        |        |        |       |        |        |        |         |       |       |



**Table S3:** Associations between preference of choice for quality Greek semi-hard and hard cheese and the sociodemographic variables.

|                                                                                                                                 | Gender     |       |       | Age      |       |       | Level of education |       |       | Civil state |       |       | Job situation |       |       | Residency |       |       |
|---------------------------------------------------------------------------------------------------------------------------------|------------|-------|-------|----------|-------|-------|--------------------|-------|-------|-------------|-------|-------|---------------|-------|-------|-----------|-------|-------|
|                                                                                                                                 | $\chi^2$ * | V**   | p***  | $\chi^2$ | V     | p     | $\chi^2$           | V     | p     | $\chi^2$    | V     | p     | $\chi^2$      | V     | p     | $\chi^2$  | V     | p     |
| How important are for you the following <u>INFORMATION</u> for the selection of QUALITY GREEK SEMI-HARD AND HARD CHEESE         |            |       |       |          |       |       |                    |       |       |             |       |       |               |       |       |           |       |       |
| The price of the semi-hard and hard cheese                                                                                      | 10.981     | 0.114 | 0.027 |          |       |       |                    |       |       |             |       |       |               |       |       |           |       |       |
| The branding                                                                                                                    |            |       |       | 37.379   | 0.106 | 0.002 | 15.622             | 0.097 | 0.048 |             |       |       | 23.657        | 0.098 | 0.023 |           |       |       |
| The date of production                                                                                                          | 15.703     | 0.138 | 0.003 |          |       |       |                    |       |       |             |       |       |               |       |       |           |       |       |
| The geographical origin                                                                                                         |            |       |       | 88.629   | 0.163 | 0.000 |                    |       |       | 76.495      | 0.176 | 0.000 | 51.648        | 0.144 | 0.001 | 46.411    | 0.118 | 0.000 |
| The existence of quality certificates such as PDO.                                                                              |            |       |       | 32.008   | 0.098 | 0.010 |                    |       |       | 25.906      | 0.102 | 0.011 |               |       |       | 28.139    | 0.092 | 0.030 |
| How important are the following <u>ORGANOLEPTIC PARAMETERS</u> for the selection of QUALITY GREEK SEMI-HARD AND HARD CHEESE     |            |       |       |          |       |       |                    |       |       |             |       |       |               |       |       |           |       |       |
| The Taste                                                                                                                       | 10.687     | 0.112 | 0.030 |          |       |       |                    |       |       |             |       |       |               |       |       |           |       |       |
| The aroma                                                                                                                       | 21.441     | 0.161 | 0.001 |          |       |       |                    |       |       |             |       |       |               |       |       |           |       |       |
| The hardness                                                                                                                    |            |       |       |          |       |       |                    |       |       |             |       |       |               |       |       |           |       |       |
| The odor                                                                                                                        | 30.228     | 0.191 | 0.000 |          |       |       | 15.554             | 0.097 | 0.049 |             |       |       |               |       |       |           |       |       |
| How important are the following <u>APPEARANCE PARAMETERS</u> for the selection of QUALITY GREEK SEMI-HARD AND HARD CHEESE       |            |       |       |          |       |       |                    |       |       |             |       |       |               |       |       |           |       |       |
| The color                                                                                                                       | 16.675     | 0.141 | 0.002 | 29.091   | 0.093 | 0.023 |                    |       |       |             |       |       |               |       |       |           |       |       |
| The appearance                                                                                                                  | 16.348     | 0.140 | 0.003 |          |       |       |                    |       |       |             |       |       |               |       |       |           |       |       |
| The texture                                                                                                                     | 32.647     | 0.197 | 0.001 |          |       |       |                    |       |       |             |       |       |               |       |       |           |       |       |
| The package appearance                                                                                                          |            |       |       |          |       |       |                    |       |       | 21.279      | 0.093 | 0.046 |               |       |       |           |       |       |
| The size of the package                                                                                                         |            |       |       |          |       |       |                    |       |       | 21.053      | 0.093 | 0.050 |               |       |       |           |       |       |
| How important are the following <u>SUSTAINABLE CHARACTERISTICS</u> for the selection of QUALITY GREEK SEMI-HARD AND HARD CHEESE |            |       |       |          |       |       |                    |       |       |             |       |       |               |       |       |           |       |       |
| Origin of the milk                                                                                                              | 10.162     | 0.110 | 0.038 | 28.540   | 0.092 | 0.027 |                    |       |       | 21.109      | 0.092 | 0.049 | 22.528        | 0.094 | 0.032 | 35.650    | 0.103 | 0.003 |
| Biological                                                                                                                      |            |       |       |          |       |       |                    |       |       | 22.497      | 0.095 | 0.032 |               |       |       | 35.436    | 0.104 | 0.003 |
| Nutritional indications                                                                                                         | 10.145     | 0.111 | 0.038 |          |       |       |                    |       |       | 25.654      | 0.102 | 0.012 |               |       |       |           |       |       |
| Percentage of fats                                                                                                              |            |       |       | 27.125   | 0.090 | 0.040 |                    |       |       | 24.187      | 0.099 | 0.019 |               |       |       |           |       |       |
| Low salt                                                                                                                        | 25.565     | 0.176 | 0.000 | 30.060   | 0.095 | 0.018 |                    |       |       |             |       |       |               |       |       |           |       |       |
| How important are the following <u>GENERAL CHARACTERISTICS</u> for the selection of QUALITY GREEK SEMI-HARD AND HARD CHEESE     |            |       |       |          |       |       |                    |       |       |             |       |       |               |       |       |           |       |       |
| Rational value for money                                                                                                        |            |       |       |          |       |       | 50.230             | 0.173 | 0.000 | 35.347      | 0.118 | 0.000 |               |       |       |           |       |       |

|                                                                                                      |        |       |       |        |       |       |        |       |       |
|------------------------------------------------------------------------------------------------------|--------|-------|-------|--------|-------|-------|--------|-------|-------|
| Unique and special                                                                                   | 31.799 | 0.098 | 0.011 |        |       |       |        |       |       |
| Added value for the region<br>where it is produced                                                   | 30.367 | 0.096 | 0.016 | 24.264 | 0.099 | 0.019 | 34.478 | 0.103 | 0.005 |
| A myth (historical<br>narrative)                                                                     |        |       |       |        |       |       |        |       |       |
| Timeless but also modern                                                                             |        |       |       |        |       |       |        |       |       |
| * chi-square test, ** Cramer's or Phi coefficient, and *** level of significance of 5%: $p < 0.05$ . |        |       |       |        |       |       |        |       |       |

**Table S4:** Associations between knowledge and preference of Ladotyri and the sociodemographic variables.

| Gender                                                                                                                            |       |       | Age      |       |       | Level of education |       |       | Civil state |       |       | Job situation |       |       | Residency |       |       |
|-----------------------------------------------------------------------------------------------------------------------------------|-------|-------|----------|-------|-------|--------------------|-------|-------|-------------|-------|-------|---------------|-------|-------|-----------|-------|-------|
| $\chi^2$ *                                                                                                                        | V**   | p***  | $\chi^2$ | V     | p     | $\chi^2$           | V     | p     | $\chi^2$    | V     | p     | $\chi^2$      | V     | p     | $\chi^2$  | V     | p     |
| Do you know the LADOTYRI CHEESE?                                                                                                  |       |       |          |       |       |                    |       |       |             |       |       |               |       |       |           |       |       |
|                                                                                                                                   |       |       | 54.305   | 0.253 | 0.000 |                    |       |       | 34.735      | 0.203 | 0.000 | 36.028        | 0.206 | 0.000 | 14.772    | 0.132 | 0.005 |
| Have you tasted LADOTYRI or are you consuming it occasionally?                                                                    |       |       |          |       |       |                    |       |       |             |       |       |               |       |       |           |       |       |
| 9.475                                                                                                                             | 0.106 | 0.002 | 60.361   | 0.267 | 0.000 |                    |       |       | 32.148      | 0.195 | 0.001 | 30.697        | 0.190 | 0.001 | 12.151    | 0.120 | 0.016 |
| Where do you think is LADOTYRI produced?                                                                                          |       |       |          |       |       |                    |       |       |             |       |       |               |       |       |           |       |       |
| Epirus region                                                                                                                     |       |       | 10.736   | 0.112 | 0.030 |                    |       |       |             |       |       |               |       |       | 16.936    | 0.141 | 0.002 |
| Samos island                                                                                                                      |       |       |          |       |       | 44.796             | 0.229 | 0.000 | 10.730      | 0.112 | 0.013 | 10.932        | 0.113 | 0.012 |           |       |       |
| Macedonia region                                                                                                                  |       |       |          |       |       |                    |       |       |             |       |       |               |       |       |           |       |       |
| Creta island                                                                                                                      |       |       |          |       |       |                    |       |       |             |       |       |               |       |       |           |       |       |
| Peloponnese region                                                                                                                |       |       |          |       |       |                    |       |       |             |       |       |               |       |       |           |       |       |
| Lesvos island                                                                                                                     |       |       | 19.216   | 0.150 | 0.001 |                    |       |       | 14.602      | 0.131 | 0.002 |               |       |       | 12.384    | 0.120 | 0.015 |
| Lemnos island                                                                                                                     |       |       |          |       |       |                    |       |       |             |       |       | 10.884        | 0.113 | 0.012 |           |       |       |
| None of the above                                                                                                                 |       |       |          |       |       |                    |       |       |             |       |       |               |       |       |           |       |       |
| Which do you think are the unique characteristics of LADOTYRI?                                                                    |       |       |          |       |       |                    |       |       |             |       |       |               |       |       |           |       |       |
| Bitter taste                                                                                                                      |       |       |          |       |       | 15.796             | 0.136 | 0.001 |             |       |       | 8.466         | 0.100 | 0.037 | 9.487     | 0.106 | 0.050 |
| Unique aroma                                                                                                                      |       |       |          |       |       |                    |       |       |             |       |       | 12.638        | 0.122 | 0.005 |           |       |       |
| Unique flavor                                                                                                                     |       |       | 17.054   | 0.142 | 0.002 |                    |       |       |             |       |       |               |       |       |           |       |       |
| Low salt                                                                                                                          |       |       | 14.248   | 0.129 | 0.007 |                    |       |       |             |       |       |               |       |       |           |       |       |
| Healthy                                                                                                                           |       |       |          |       |       |                    |       |       |             |       |       |               |       |       |           |       |       |
| POD product of origin                                                                                                             |       |       | 17.691   | 0.144 | 0.001 |                    |       |       | 12.958      | 0.124 | 0.005 | 8.217         | 0.098 | 0.042 |           |       |       |
| You don't know                                                                                                                    |       |       | 15.244   | 0.134 | 0.004 |                    |       |       |             |       |       | 8.659         | 0.101 | 0.034 |           |       |       |
| Do you think it is an added value the OLIVE OIL in which LADOTYRI is inside?                                                      |       |       |          |       |       |                    |       |       |             |       |       |               |       |       |           |       |       |
|                                                                                                                                   |       |       | 12.158   | 0.120 | 0.016 |                    |       |       |             |       |       | 9.094         | 0.104 | 0.028 |           |       |       |
| Do you think it will be an added value if LADOTYRI is the ONLY NON-REFRIGERATED GREEK CHEESE preserved by the olive oil it is in? |       |       |          |       |       |                    |       |       |             |       |       |               |       |       |           |       |       |
|                                                                                                                                   |       |       | 10.673   | 0.112 | 0.031 |                    |       |       | 9.570       | 0.107 | 0.023 | 8.431         | 0.100 | 0.038 |           |       |       |
| Would you buy, or prefer a non-refrigerated CHEESE TODAY, after the COVID-19 pandemic?                                            |       |       |          |       |       |                    |       |       |             |       |       |               |       |       |           |       |       |
| 8.048                                                                                                                             | 0.098 | 0.005 |          |       |       |                    |       |       |             |       |       |               |       |       | 12.981    | 0.125 | 0.011 |

| What would you like to eat with the LADOTYRI CHEESE if you had the chance?                               |       |       |       |        |       |       |        |       |       |        |       |        |       |       |
|----------------------------------------------------------------------------------------------------------|-------|-------|-------|--------|-------|-------|--------|-------|-------|--------|-------|--------|-------|-------|
| Meat                                                                                                     |       |       |       | 12.595 | 0.123 | 0.013 |        |       |       |        |       |        |       |       |
| Fish                                                                                                     | 4.528 | 0.074 | 0.033 | 19.509 | 0.153 | 0.001 | 23.785 | 0.170 | 0.001 | 12.013 | 0.120 | 0.007  |       |       |
| Wine                                                                                                     |       |       |       | 9.521  | 0.107 | 0.049 |        |       |       | 11.455 | 0.117 | 0.010  |       |       |
| Bread and olives                                                                                         | 4.483 | 0.073 | 0.034 |        |       |       |        |       |       |        |       | 13.104 | 0.126 | 0.011 |
| Fruits                                                                                                   |       |       |       |        |       |       |        |       |       |        |       |        |       |       |
| Nuts                                                                                                     |       |       |       |        |       |       |        |       |       |        |       |        |       |       |
| Alone                                                                                                    |       |       |       |        |       |       |        |       |       |        |       |        |       |       |
| Where would you like to purchase LADOTYRI cheese if you had the chance TODAY                             |       |       |       |        |       |       |        |       |       |        |       |        |       |       |
| From supermarket                                                                                         |       |       |       |        |       |       |        |       |       |        |       |        |       |       |
| From the neighborhood                                                                                    |       |       |       |        |       |       |        |       |       |        |       |        |       |       |
| grocery store                                                                                            |       |       |       |        |       |       |        |       |       |        |       |        |       |       |
| From open market                                                                                         |       |       |       |        |       |       |        |       |       |        |       |        |       |       |
| Via on line                                                                                              |       |       |       |        |       |       |        |       |       |        |       |        |       |       |
| Do you believe that LESVOS' island is producing quality cheeses or not. compared with the rest of Greece |       |       |       |        |       |       |        |       |       |        |       |        |       |       |
|                                                                                                          |       |       |       |        |       |       |        |       |       |        |       |        |       |       |
| * chi-square test, ** Cramer's or Phi coefficient, and *** level of significance of 5%: $p < 0.05$ .     |       |       |       |        |       |       |        |       |       |        |       |        |       |       |
